# Supplementary material for: Radiologically isolated syndrome in children: Clinical and radiologic outcomes
Source: PubMed Central journal article supplement — Neurol Neuroimmunol Neuroinflamm. 2017 Sep 25;4(6):e395. doi: 10.1212/NXI.0000000000000395 (PMC5614726; doi:10.1212/nxi.0000000000000395), 2017-09-25
Supplement: supp_4.6.e395_Study_group_members.pdf [file supp_4.6.e395_Study_group_members.pdf]

## **Observatoire Francophone de la Sclérose en Plaques (OFSEP)**

Sandra VUKUSIC, MD PhD (Lyon, site investigator), Marc DEBOUVERIE, MD PhD (Nancy, site investigator), Gilles EDAN, MD PhD (Rennes, site investigator), David BRASSAT, MD PhD (Toulouse, site investigator), Bruno BROCHET, MD FEAN (Bordeaux, site investigator), Caroline PAPEIX, MD (Paris Salpêtrière, site investigator), Bruno STANKOFF, MD, PhD (Paris Saint Antoine, site investigator), Alain CREANGE, MD PhD (Paris Créteil, site investigator), Céline LABEYRIE, MD (Paris Bicêtre, site investigator), Olivier GOUT, MD (Paris Fondation Rothschild, site investigator), Olivier HEINZLEF, MD (Paris Poissy, site investigator), Jérôme DE SEZE, MD PhD (Strasbourg, site investigator), Patrick VERMERSCH, MD PhD (Lille, site investigator), Patrick HAUTECOEUR, MD PhD (Lille Institut Catholique, site investigator), Christine LEBRUN-FRENAY, MD PhD (Nice, site investigator), Thibault MOREAU, MD PhD (Dijon, site investigator), Pierre CLAVELOU, MD PhD (Clermont-Ferrand, site investigator), David LAPLAUD, MD PhD (Nantes, site investigator), Jean PELLETIER, MD PhD (Marseille, site investigator), Gilles DEFER, MD PhD (Caen, site investigator), Eric BERGER, MD (Besançon, site investigator), Eric THOUVENOT, MD PhD (Nîmes, site investigator), Philippe CABRE, MD PhD (Fort-de-France, site investigator), Pierre LABAUGE, MD PhD (Montpellier, site investigator), Bertrand BOURRE, MD (Rouen, site investigator), Jean-Philippe CAMDESSANCHE, MD PhD (Saint-Etienne, site investigator), Laurent MAGY, MD PhD (Limoges, site investigator), Abdelatif AL-KHEDR, MD (Amiens, site investigator), Ayman TOURBAH, MD PhD (Reims, site investigator), Olivier CASEZ, MD (Grenoble, site investigator), Anne-Marie GUENNNOC, MD (Tours, site investigator), Jonathan CIRON, MD (Poitiers, site investigator), Eric MANCHON, MD (Gonesse, site investigator), Corinne POTTIER, MD (Pontoise, site investigator), Mathilde CAMUS-JACQMIN, MD (Saint Denis, site investigator), and Ivania PATRY, MD (Corbeil Essonnes, site investigator).

## **Société Francophone de la Sclérose en Plaques (SFSEP)**

Executive committee: Jérôme DE SEZE, MD PhD (Strasbourg), Hélène ZEPHIR, MD PhD (Lille), Sophie PITTION, MD (Nancy), Christine LEBRUN-FRENAY, MD PhD (Nice), Sandra VUKUSIC, MD PhD (Lyon), Bruno STANKOFF, MD PhD (Paris Saint Antoine), Aurélie Ruet, MD, PhD (Bordeaux), Jean Marc FAUCHEUX, MD (Agen), Cecile Donzen, MD (IC Lille), Patricia Benardy, MD (Carcassonne), Evelyne Planque, MD (Nancy), and Catherine Mouzawak, RN (Poissy).

Romain Marignier, MD PhD (Lyon, site investigator), Guillaume Matthey, MD (Nancy, site investigator), Emmanuelle LE PAGE, MD (Rennes, site investigator), David BRASSAT, MD PhD (Toulouse, site investigator), JC Ouallet, MD, PhD (Bordeaux, site investigator), Caroline PAPEIX, MD (Paris Salpêtrière, site investigator), Alain CREANGE, MD PhD (Paris Créteil, site investigator), A GUEGEN, MD (Paris Fondation Rothschild, site investigator), Olivier HEINZLEF, MD (Paris Poissy, site investigator), Nicolas COLLONGUES, MD PhD (Strasbourg, site investigator), Hélène ZEPHIR (Lille, site investigator), Arnaud KIAKOWSKI, MD PhD (Lille Institut Catholique, site investigator), Mikael COHEN, MD (Nice, site investigator), Agnès FROMONT MD PhD (Dijon, site investigator), Frederic TAITHE, MD (Clermont-Ferrand, site investigator), Sandrine WIERTLEVSKI, MD (Nantes, site investigator), Bertrand AUDOIN, MD PhD (Marseille, site investigator), Nathalie DERACHE, MD (Caen, site investigator), Eric BERGER, MD (Besançon, site investigator), Eric THOUVENOT, MD PhD (Nîmes, site investigator), Philippe CABRE, MD PhD (Fort-de-France, site investigator), Clarisse Carra-Dallière, MD (Montpellier, site investigator), Bertrand BOURRE, MD (Rouen, site investigator), Abdelatif AL-KHEDR, MD (Amiens, site investigator), Ayman TOURBAH, MD PhD (Reims, site investigator), Olivier CASEZ, MD (Grenoble, site investigator), Anne-Marie

GUENNNOC, MD (Tours, site investigator), Jonathan CIRON, MD (Poitiers, site investigator), 4Riadh GOUIDER, MD (Tunisia, site investigator), Ilham SLASSENOU, MD (Morocco, site investigator), Dominique DIVE, MD (Belgium, site investigator), and Pierreae SEELDRAYERS, MD (Charleroi, site investigator).

**Radiologically Isolated Syndrome Consortium (RISC)**

Orhun Kantarci MD (Mayo Clinic, principal investigator), Christine Lebrun-Frenay MD PhD (Hopital Pasteur Nice, principal investigator), Darin T. Okuda MD (UT Southwestern, principal investigator), Aksel Siva MD (University of Istanbul, principal investigator), and Daniel Pelletier MD (University of Southern California, principal investigator).
