# Supplementary material for: Radiologically isolated syndrome in children: Clinical and radiologic outcomes
Source: PubMed Central journal article supplement — Neurol Neuroimmunol Neuroinflamm. 2017 Sep 25;4(6):e395. doi: 10.1212/NXI.0000000000000395 (PMC5614726; doi:10.1212/nxi.0000000000000395), 2017-09-25
Supplement: supp_4.6.e395_Supplementary_Table_FINAL_pdf.pdf [file supp_4.6.e395_Supplementary_Table_FINAL_pdf.pdf]

## **Supplementary Table. Participating Centers and Study Subjects by Region**

### **United States of America (n=15)**

University of Pennsylvania, Philadelphia, PA  
University of Rochester Medical Center, Rochester, NY  
University of Southern California, Los Angeles, CA  
University of Texas Southwestern, Dallas, TX  
Yale University, New Haven, CT

### **France (n=11)**

Centre Hospitalo Universitaire Montpellier, Montpellier  
Centre Hospitalo Universitaire Pasteur, Nice  
Centre Hospitalo Universitaire Strasbourg, Strasbourg  
Centre Hospitalo Universitaire Timone, Marseille  
Hôpital Neurologique Pierre Wertheimer, Lille  
Centre Hospitalo Universitaire Purpan, Toulouse  
Centre Hospitalo Universitaire Lyon, Lyon

### **Turkey (n=5)**

Istanbul University Cerrahpasa School of Medicine, Istanbul

### **United Kingdom (n=4)**

Birmingham Children's Hospital, Birmingham

### **Argentina (n=2)**

Multiple Sclerosis Center of Buenos Aires, Buenos Aires

### **Spain (n=1)**

Multiple Sclerosis Center of Catalunya Cemcat, Barcelona
